# Supplementary material for: Circulating biomarkers associated with aortic diameter in male and female patients with thoracic aortic disease: a cross-sectional study
Source: PubMed Central journal article supplement — Open Heart. 2023 Jun 29;10(1):e002317. doi: 10.1136/openhrt-2023-002317 (PMC10314683; doi:10.1136/openhrt-2023-002317), 2023-06-29
Supplement: openhrt-2023-002317supp001.pdf [file openhrt-2023-002317supp001.pdf]

## Appendices

### Appendix Ia. Aortic thoracic diameter at multiple levels – measured at CT or TTE

|                                                            | All patients (n=158) | Males (n=99)      | Females (n=59)    | P-value | Missing (%) |
|------------------------------------------------------------|----------------------|-------------------|-------------------|---------|-------------|
| Maximal diameter thoracic aorta (mm)                       | 43.2 ± 5.2           | 43.9 ± 5.2        | 41.9 ± 5.1        | 0.030   | 3.8         |
| Indexed diameter thoracic aorta (mm/m <sup>2</sup> )       | 21.2 ± 2.9           | 20.5 ± 2.9        | 22.5 ± 3.5        | <0.001  | 4.4         |
| Maximal diameter ascending aorta (mm)                      | 42.92 (5.14)         | 43.82 (5.17)      | 41.31 (4.70)      | 0.004   | 5.1         |
| Indexed diameter max. ascending aorta (mm/m <sup>2</sup> ) | 21.0 [19.0, 22.6]    | 20.6 [18.9, 22.1] | 21.8 [19.7, 24.4] | 0.007   | 5.7         |
| Annulus                                                    | 30.0 [25.50, 32.00]  | 30.0 [28.0, 32.5] | 28.0 [25.0, 32.0] | 0.474   | 81.0        |
| Sinus of Valsalva                                          | 39.0 [36.0, 43.0]    | 42.0 [38.0, 46.0] | 36.0 [34.0, 39.0] | <0.001  | 11.4        |
| Sinotubular junction                                       | 35.0 [33.0, 39.0]    | 37.0 [34.0, 41.0] | 34.0 [31.0, 36.0] | <0.001  | 48.1        |
| Ascending aorta                                            | 41.0 [37.0, 44.0]    | 41.0 [37.0, 44.3] | 40.0 [33.0, 44.0] | 0.528   | 5.7         |
| Aortic arch                                                | 32.0 [29.0, 35.0]    | 32.0 [30.0, 36.0] | 31.0 [27.0, 34.0] | 0.049   | 23.4        |
| Descending aorta                                           | 29.0 [26.0, 32.0]    | 29.0 [27.0, 32.0] | 28.0 [25.0, 32.0] | 0.344   | 34.2        |

Normally distributed continuous variables are expressed as mean ± SD, skewed continuous variables are expressed as median and 25th–75th percentile. CT = cardiac tomography, TTE = transthoracic echocardiography.

### Appendix Ib. Aortic thoracic diameter at multiple levels – measured at CT only

|                      | All patients (n=158) | Males (n=99)         | Females (n=59)       | P-value | Missing (%) |
|----------------------|----------------------|----------------------|----------------------|---------|-------------|
| CTA performed        | 106 (67.1)           | 64 (64.6)            | 42 (71.2)            | 0.502   | 0.0         |
| Annulus              | 30.00 [38.00, 32.75] | 32.00 [29.50, 33.00] | 28.00 [25.00, 32.00] | 0.099   | 83.5        |
| Sinus of Valsalva    | 39.00 [36.00, 43.00] | 42.00 [38.00, 47.00] | 36.00 [34.00, 38.75] | <0.001  | 39.9        |
| Sinotubular junction | 35.00 [33.00, 39.00] | 37.50 [34.00, 41.00] | 34.00 [31.00, 35.75] | <0.001  | 48.1        |
| Ascending aorta      | 39.82 (5.97)         | 39.98 (5.41)         | 39.57 (6.79)         | 0.731   | 33.5        |

|                  |                         |                         |                         |       |      |
|------------------|-------------------------|-------------------------|-------------------------|-------|------|
| Aortic arch      | 32.00<br>[29.00, 35.00] | 32.00<br>[30.00, 35.25] | 31.00<br>[27.00, 34.25] | 0.116 | 36.7 |
| Descending aorta | 29.00<br>[26.00, 32.00] | 29.00<br>[27.00, 32.00] | 28.00<br>[25.00, 32.00] | 0.344 | 34.2 |
| Aorta abdominals | 22.00<br>[19.00, 25.00] | 23.00<br>[21.00, 27.00] | 21.00<br>[18.00, 24.00] | 0.023 | 41.1 |

Normally distributed continuous variables are expressed as mean  $\pm$  SD, skewed continuous variables are expressed as median and 25th–75th percentile. CT = cardiac tomography, TTE = transthoracic echocardiography.

#### Appendix Ic. Aortic thoracic diameter at multiple levels – measured at TTE only

|                      | All patients<br>(n=158) | Males (n=99)            | Females<br>(n=59)       | P-<br>value | Missing<br>(%) |
|----------------------|-------------------------|-------------------------|-------------------------|-------------|----------------|
| TTE performed        | 108 (68.4)              | 73 (73.7)               | 35 (59.3)               | 0.088       | 0.0            |
| Annulus              | 25.17 (4.12)            | 25.20 (4.60)            | 25.00 (NA)              | NA          | 96.2           |
| Sinus of Valsalva    | 40.46 (5.88)            | 41.92 (5.70)            | 36.75 (4.64)            | <0.001      | 46.2           |
| Sinotubular junction | 36.00 (4.76)            | 37.67 (4.16)            | 31.00 (NA)              | NA          | 97.5           |
| Ascending aorta      | 41.00<br>[37.00, 43.00] | 41.00<br>[37.00, 43.00] | 41.00<br>[37.00, 44.25] | 0.821       | 39.2           |
| Aortic arch          | 32.15 (5.28)            | 32.84 (4.76)            | 29.00 (6.73)            | 0.081       | 75.3           |

Normally distributed continuous variables are expressed as mean  $\pm$  SD, skewed continuous variables are expressed as median and 25th–75th percentile. CT = cardiac tomography, TTE = transthoracic echocardiography.

**Appendix II.** Circulating biomarker levels stratified by sex

| <b>Biomarker</b>           | <b>All patients (n=158)</b>   | <b>Males (n=99)</b>           | <b>Females (n=59)</b>         | <b>P-value</b>   | <b>Missing %</b> |
|----------------------------|-------------------------------|-------------------------------|-------------------------------|------------------|------------------|
| MFAP4 (ng/ml)              | 0.48<br>[0.08, 5.61]          | 0.80<br>[0.08, 6.92]          | 0.20<br>[0.08, 3.17]          | 0.102            | 0.0              |
| FBN1 (ng/ml)               | 1908.00<br>[1698.00, 2313.50] | 2055.00<br>[1728.00, 2454.00] | 1829.00<br>[1612.50, 2044.50] | <b>0.002</b>     | 0.0              |
| PIIINP (pg/ml)             | 13.20<br>[10.53, 15.20]       | 13.60<br>[11.40, 15.70]       | 11.80<br>[9.30, 14.65]        | <b>0.011</b>     | 0.0              |
| hsTNT (ng/l)               | 6.00<br>[4.00, 10.00]         | 8.00<br>[5.00, 12.00]         | 5.00<br>[1.50, 7.50]          | <b>&lt;0.001</b> | 0.0              |
| NT-pro BNP (pmol/L)        | 10.00<br>[5.75, 18.25]        | 8.50<br>[4.00, 15.00]         | 13.50<br>[7.00, 25.25]        | <b>0.012</b>     | 8.9              |
| IL-6 (pg/ml)               | 2.00<br>[1.00, 3.00]          | 2.00<br>[1.00, 3.00]          | 2.00<br>[1.00, 3.00]          | 0.910            | 0.0              |
| GDF-15 (pg/ml)             | 855.00<br>[654.00, 1222.25]   | 849.00<br>[638.00, 1324.50]   | 864.00<br>[686.00, 1156.00]   | 0.695            | 0.0              |
| hsCRP (mg/L)               | 1.10<br>[0.60, 2.50]          | 1.10<br>[0.60, 1.98]          | 1.40<br>[0.70, 3.25]          | 0.077            | 0.6              |
| Triglycerides (mmol/L)     | 1.58<br>[1.07, 2.06]          | 1.73<br>[1.20, 2.19]          | 1.32<br>[0.98, 1.84]          | <b>0.012</b>     | 7.6              |
| Total cholesterol (mmol/L) | 4.77 (0.96)                   | 4.63 (0.96)                   | 4.99 (0.94)                   | <b>0.025</b>     | 7.6              |
| HDL-cholesterol (mmol/L)   | 1.30<br>[1.10, 1.57]          | 1.15<br>[1.02, 1.43]          | 1.51<br>[1.26, 1.83]          | <b>&lt;0.001</b> | 7.6              |
| LDL-cholesterol (mmol/L)   | 3.10 (0.90)                   | 3.02 (0.91)                   | 3.22 (0.88)                   | 0.196            | 7.6              |
| Total cholesterol/HDL      | 3.41<br>[2.87, 4.28]          | 3.64<br>[2.95, 4.54]          | 3.18<br>[2.69, 3.90]          | <b>0.008</b>     | 7.6              |
| Homocysteine (µmol/L)      | 14.40<br>[12.31, 17.25]       | 14.70<br>[12.70, 17.15]       | 13.85<br>[11.35, 17.48]       | 0.160            | 0.0              |
| Haemoglobin (mmol/L)       | 8.83 (0.91)                   | 9.20 (0.80)                   | 8.26 (0.75)                   | <b>&lt;0.001</b> | 8.2              |
| RDW (%)                    | 12.90<br>[12.40, 13.50]       | 12.80<br>[12.40, 13.40]       | 12.90<br>[12.40, 13.53]       | 0.515            | 8.2              |
| TSH (mU/L)                 | 1.58<br>[1.22, 2.09]          | 1.62<br>[1.21, 2.07]          | 1.57<br>[1.24, 2.46]          | 0.921            | 36.1             |
| fT4 (pmol/L)               | 16.10 (3.11)                  | 16.17 (3.18)                  | 15.99 (3.01)                  | 0.792            | 36.1             |
| T4 (nmol/L)                | 99.96 (22.53)                 | 96.87 (21.25)                 | 105.28 (23.95)                | 0.075            | 38.0             |
| T3 (nmol/L)                | 1.88<br>[1.68, 2.07]          | 1.91<br>[1.70, 2.07]          | 1.81<br>[1.68, 2.02]          | 0.234            | 37.3             |
| Creatinine (µmol/L)        | 81.50<br>[69.00, 92.00]       | 87.00<br>[80.00, 98.25]       | 69.50<br>[62.00, 77.00]       | <b>&lt;0.001</b> | 5.1              |
| eGFR (mL/min)              | 83.55 (18.60)                 | 82.23 (19.75)                 | 85.64 (16.58)                 | 0.276            | 5.1              |
| Ureum (mmol/L)             | 5.60<br>[4.80, 6.60]          | 5.70<br>[5.20, 6.60]          | 5.20<br>[4.40, 6.38]          | <b>0.008</b>     | 6.3              |

Normally distributed continuous variables are expressed as mean  $\pm$  SD, skewed continuous variables are expressed as median and 25th–75th percentile.

P-values  $< 0.05$  are depicted in bold.

MFAP4 = microfibrillar-associated protein 4, FBN1 = human fibrillin-1, PIIINP = procollagen III, hsTnT = high-sensitivity troponin-T, NT-pro BNP = N-Terminal Propeptide, IL-6 = interleukin-6, GDF-15 = growth-differentiation factor-15, hsCRP = high-sensitivity C-reactive protein, HDL = high-density lipoprotein, LDL = low-density lipoprotein, RDW = red cell distribution width, TSH = thyroid stimulating hormone, fT4 = free thyroxin, T4 = thyroxin, T3 = triiodothyronine, eGFR = estimated glomerular filtration rate

**Appendix III.** Plotting interaction with sex and MFAP4 and homocysteine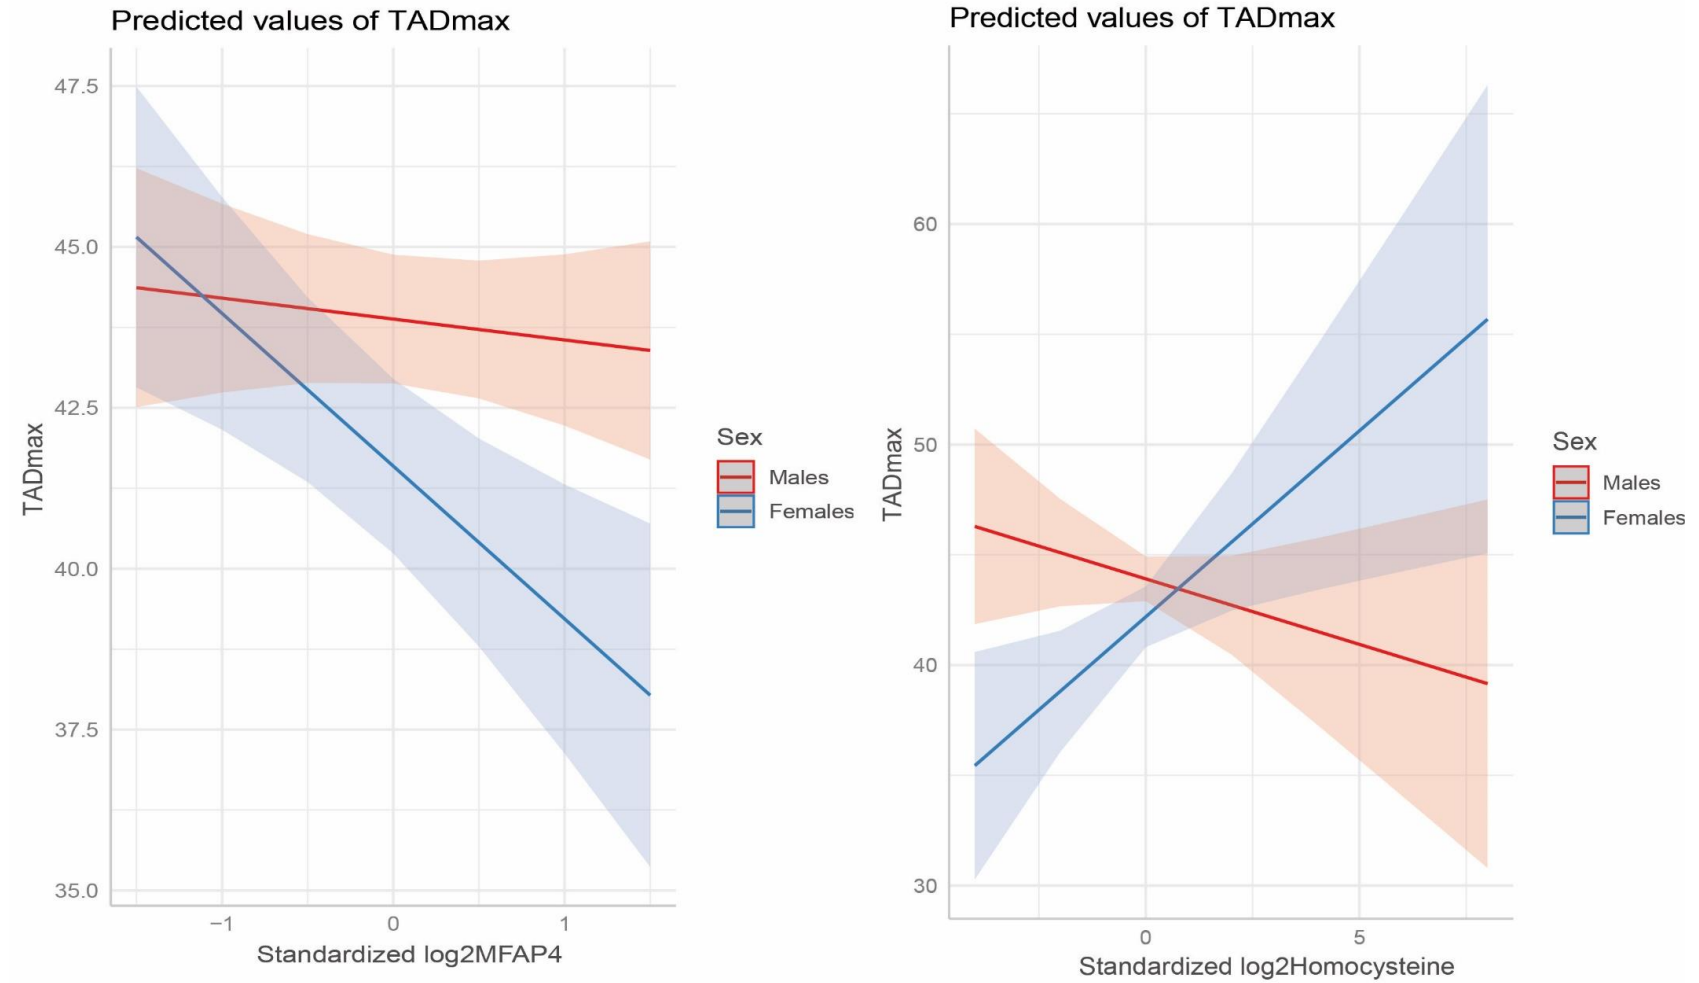

#### Appendix IV. Univariable and multivariable model clinical factors associated with TADmax.

| Variable                               | Univariable analysis                       |         | Final multivariable model                  |         |
|----------------------------------------|--------------------------------------------|---------|--------------------------------------------|---------|
|                                        | Mean difference (95%CI) in TADmax per unit | P-value | Mean difference (95%CI) in TADmax per unit | P value |
| Age per 10 years*                      | 1.400 (0.850-1.940)                        | <0.001  | 0.450 (-0.140-1.040)                       | 0.137   |
| Sex:Female*                            | -1.921 (-3.655—0.187)                      | 0.030   | -0.997 (-2.509-0.514)                      | 0.194   |
| Height (m)                             | -1.215 (-7.112-4.681)                      | 0.684   | -                                          | -       |
| Weight (kg)*                           | 0.057 (0.012-0.103)                        | 0.014   | -                                          | -       |
| BSA (mm/m <sup>2</sup> )               | 3.238 (-0.592-7.069)                       | 0.097   | -                                          | -       |
| Systolic blood pressure per 10 mmHg    | 0.251 (-0.227-0.729)                       | 0.301   | -                                          | -       |
| Diastolic blood pressure per 10 mmHg*  | 0.785 (0.060-1.510)                        | 0.034   | -                                          | -       |
| Hypertension                           | 0.579 (-1.130-2.288)                       | 0.504   | -                                          | -       |
| Hyperlipidaemia*                       | 3.642 (1.937-5.348)                        | <0.001  | 1.940 (0.279-3.600)                        | 0.022   |
| Active smoking                         | -1.992 (-4.850-0.867)                      | 0.17    | -                                          | -       |
| Diabetes*                              | 4.340 (0.067-8.613)                        | 0.047   | -                                          | -       |
| CVA                                    | 0.705 (-2.547-3.957)                       | 0.669   | -                                          | -       |
| COPD                                   | 0.255 (-2.354-2.864)                       | 0.847   | -                                          | -       |
| BAV                                    | 0.037 (-4.690-4.764)                       | 0.988   | -                                          | -       |
| Renal dysfunction                      | 1.484 (-3.236-6.205)                       | 0.535   | -                                          | -       |
| LVEF <sup>1</sup> not normal vs normal | 0.205 (-3.265-3.674)                       | 0.907   | -                                          | -       |

|                                              |                             |        |                             |                  |
|----------------------------------------------|-----------------------------|--------|-----------------------------|------------------|
| Beta blocker use                             | 1.051 (-0.710-2.812)        | 0.24   | -                           | -                |
| ARB use                                      | 3.043 (0.892-5.193)         | 0.006  | -                           | -                |
| ACEi use                                     | 0.563 (-1.527-2.654)        | 0.595  | -                           | -                |
| Diuretics                                    | 3.107 (0.888-5.325)         | 0.006  | -                           | -                |
| Cholesterol                                  | 3.159 (1.371-4.947)         | <0.001 | -                           | -                |
| Antitrombotics                               | 0.645 (-1.082-2.372)        | 0.461  | -                           | -                |
| Hereditary TAD diagnosis *                   | -6.184 (-7.899—<br>4.471)   | <0.001 | -4.873 (-6.771- -<br>2.975) | <b>&lt;0.001</b> |
| Positive family history aortic disease       | -2.802 (-4.453- -<br>1.151) | 0.001  | -                           | -                |
| Abdominal aortic aneurysm                    | 1.391 (-1.855-4.637)        | 0.399  | -                           | -                |
| Peripheral aneurysm                          | -1.132 (-3.735-<br>1.471)   | 0.392  | -                           | -                |
| Previous aortic surgery or aortic dissection | -1.435 (-3.490-<br>0.629)   | 0.17   | -                           | -                |

\*= variables entered in full model.

Estimates can be interpreted as follows: an increase in age of 10 years (one unit) results in a mean difference of 1.40 mm in TADmax.

BSA = body surface area, CVA = cerebrovascular accident, COPD = chronic obstructive pulmonary disease, BAV = bicuspid aortic valve, LVEF = left ventricle ejection fraction, ARB = angiotensin receptor blocker, ACEi = angiotensin-converting enzyme inhibitor, TAD = thoracic aortic disease

**Appendix Va. –Univariable linear regression analysis circulating biomarkers excluding patients with prior aortic dissection or surgery (n=120)**

| Biomarker         | Mean difference (95%CI) in TADmax per doubling of the standardized biomarker | P-value      |
|-------------------|------------------------------------------------------------------------------|--------------|
| MFAP4             | -0.588<br>(-1.412-0.236)                                                     | 0.160        |
| FBN1              | -0.021<br>(-0.849-0.808)                                                     | 0.961        |
| PIIINP            | 0.596<br>(-0.181-1.372)                                                      | 0.131        |
| HsTnT             | 0.773<br>(-0.030-1.575)                                                      | 0.059        |
| NT-pro BNP        | -0.237<br>(-1.227-0.754)                                                     | 0.636        |
| IL-6              | 0.530<br>(-0.267-1.327)                                                      | 0.190        |
| hsCRP             | -1.021<br>(-1.800- -0.243)                                                   | <b>0.011</b> |
| GDF-15            | 0.490<br>(-0.319-1.298)                                                      | 0.233        |
| Triglycerides     | 0.309<br>(-0.518-1.336)                                                      | 0.496        |
| Total cholesterol | 0.409<br>(-0.518-1.336)                                                      | 0.384        |
| HDL               | -0.362<br>(-1.257-0.532)                                                     | 0.424        |
| LDL               | 0.255<br>(-0.661-1.171)                                                      | 0.582        |
| Chol/HDL          | 0.573<br>(-0.336-1.482)                                                      | 0.214        |
| Homocysteine      | 0.373<br>(-0.433-1.179)                                                      | 0.362        |
| Haemoglobin       | 0.821<br>(-0.160-1.801)                                                      | 0.100        |
| RDW               | 0.368<br>(-0.622-1.359)                                                      | 0.463        |
| TSH               | 0.355<br>(-0.636-1.347)                                                      | 0.478        |
| fT4               | -0.084<br>(-1.115-0.947)                                                     | 0.872        |
| T4                | -0.761<br>(-1.837-0.315)                                                     | 0.163        |
| T3                | -1.407<br>(-2.560- -0.255)                                                   | <b>0.017</b> |
| Creatinine        | 0.806<br>(-0.089-1.701)                                                      | 0.077        |
| eGFR              | -0.868                                                                       | 0.082        |



|       |                         |       |
|-------|-------------------------|-------|
|       | (-1.847-0.111)          |       |
| Ureum | 0.210<br>(-0.703-1.122) | 0.650 |

Estimates and corresponding 95% CI are derived from linear regression analysis with log<sub>2</sub> transformed and standardized biomarkers as independent variables, i.e. a doubling of the standardized MFAP4 value, results in a decrease of 0.588 mm in TAD<sub>max</sub>.

P-values < 0.05 are depicted in bold.

CI = confidence interval, MFAP4 = microfibrillar-associated protein 4, FBN1 = human fibrillin-1, PIIINP = procollagen III, hsTnT = high-sensitivity troponin-T, NT-pro BNP = N-Terminal Propeptide, IL-6 = interleukin-6, GDF-15 = growth-differentiation factor-15, hsCRP = high-sensitivity C-reactive protein, HDL = high-density lipoprotein, LDL = low-density lipoprotein, RDW = red cell distribution width, TSH = thyroid stimulating hormone, fT4 = free thyroxin, T4 = thyroxin, T3 = triiodothyronine, eGFR = estimated glomerular filtration rate

### Appendix Vb. - Univariable linear regression analysis biomarkers excluding patients with hereditary thoracic aortic disease (n=122)

|                   | Mean difference (95%CI) in TADmax per doubling of the standardized biomarker | P-value      |
|-------------------|------------------------------------------------------------------------------|--------------|
| Biomarker         |                                                                              |              |
| MFAP4             | -0.141 (-0.967-0.685)                                                        | 0.736        |
| FBN1              | 0.121 (-0.690-0.932)                                                         | 0.768        |
| PIIINP            | 0.017 (-0.749-0.784)                                                         | 0.965        |
| HsTnT             | 0.228 (-0.628-1.084)                                                         | 0.599        |
| NT-pro BNP        | 0.177 (-0.693-1.046)                                                         | 0.688        |
| IL-6              | 0.950 (0.186-1.713)                                                          | <b>0.015</b> |
| hsCRP             | -0.416 (-1.230-0.397)                                                        | 0.313        |
| GDF-15            | 0.465 (-0.534-1.464)                                                         | 0.359        |
| Triglycerides     | 0.747 (-0.258-1.751)                                                         | 0.144        |
| Total cholesterol | 0.019 (-0.873-0.911)                                                         | 0.966        |
| HDL               | -0.396 (-1.300-0.508)                                                        | 0.387        |
| LDL               | -0.071 (-0.918-0.775)                                                        | 0.868        |
| Chol/HDL          | 0.339 (-0.547-1.225)                                                         | 0.450        |
| Homocysteine      | 0.478 (-0.329-1.286)                                                         | 0.243        |
| Haemoglobin       | 0.386 (-0.542-1.313)                                                         | 0.412        |
| RDW               | -0.131 (-1.024-0.762)                                                        | 0.771        |
| TSH               | 0.719 (-0.262-1.700)                                                         | 0.148        |
| ft4               | 0.702 (-0.709-1.313)                                                         | 0.553        |
| T4                | 0.582 (-0.555-1.719)                                                         | 0.311        |
| T3                | -0.892 (-2.187-0.403)                                                        | 0.174        |
| Creatinine        | 0.474 (-0.383-1.330)                                                         | 0.275        |
| eGFR              | -0.528 (-1.445-0.388)                                                        | 0.256        |
| Ureum             | -0.308 (-1.185-0.569)                                                        | 0.488        |

Estimates and corresponding 95% CI are derived from linear regression analysis with log<sub>2</sub> transformed and standardized biomarkers as independent variables, i.e. a doubling of the standardized MFAP4 value, results in a decrease of 0.141 mm in TADmax.

P-values < 0.05 are depicted in bold.

CI = confidence interval, MFAP4 = microfibrillar-associated protein 4, FBN1 = human fibrillin-1, PIIINP = procollagen III, hsTnT = high-sensitivity troponin-T, NT-pro BNP = N-Terminal Propeptide, IL-6 = interleukin-6, GDF-15 = growth-differentiation factor-15, hsCRP = high-sensitivity C-reactive protein, HDL = high-density lipoprotein, LDL = low-density lipoprotein, RDW = red cell distribution width, TSH = thyroid stimulating hormone, ft4 = free thyroxine, T4 = thyroxine, T3 = triiodothyronine, eGFR = estimated glomerular filtration rate

### Appendix Vc. - Univariable linear regression analysis max thoracic aortic diameter – only CT (n=106)

|                   | Mean difference (95%CI) in TADmax per doubling of the standardized biomarker | P-value          |
|-------------------|------------------------------------------------------------------------------|------------------|
| Biomarker         |                                                                              |                  |
| MFAP4             | -0.991 (-1.971- -0.010)                                                      | <b>0.048</b>     |
| FBN1              | -0.072 (-1.146-1.003)                                                        | 0.895            |
| PIIINP            | 0.305 (-0.586-1.196)                                                         | 0.499            |
| HsTnT             | 0.614 (-0.405-1.633)                                                         | 0.235            |
| NT-pro BNP        | 0.259 (-0.962-1.479)                                                         | 0.675            |
| IL-6              | 1.287 (0.360-2.214)                                                          | <b>0.007</b>     |
| hsCRP             | -0.263 (-1.232-0.705)                                                        | 0.591            |
| GDF-15            | 1.196 (0.125-2.268)                                                          | <b>0.029</b>     |
| Triglycerides     | 1.032 (-0.072-2.135)                                                         | 0.067            |
| Total cholesterol | 0.576 (-0.495-1.648)                                                         | 0.288            |
| HDL               | -0.028 (-1.169-1.113)                                                        | 0.961            |
| LDL               | 0.248 (-0.837-1.333)                                                         | 0.651            |
| Chol/HDL          | 0.417 (-0.706-1.540)                                                         | 0.463            |
| Homocysteine      | 1.288 (0.141-2.434)                                                          | <b>0.028</b>     |
| Haemoglobin       | 0.494 (-0.645-1.634)                                                         | 0.391            |
| RDW               | 0.359 (-0.792-1.510)                                                         | 0.537            |
| TSH               | 1.803 (0.097-3.508)                                                          | <b>0.039</b>     |
| ft4               | 0.139 (-1.319-1.597)                                                         | 0.849            |
| T4                | -0.477 (-1.819-0.865)                                                        | 0.480            |
| T3                | -1.914 (-2.992- -0.836)                                                      | <b>&lt;0.001</b> |
| Creatinine        | 1.370 (0.239-2.501)                                                          | <b>0.018</b>     |
| eGFR              | -2.052 (-3.141- -0.962)                                                      | <b>&lt;0.001</b> |
| Ureum             | 0.623 (-0.515-1.761)                                                         | 0.280            |

Estimates and corresponding 95% CI are derived from linear regression analysis with log<sub>2</sub> transformed and standardized biomarkers as independent variables, i.e. a doubling of the standardized MFAP4 value, results in a decrease of 0.991 mm in TADmax.

P-values < 0.05 are depicted in bold.

CI = confidence interval, MFAP4 = microfibrillar-associated protein 4, FBN1 = human fibrillin-1, PIIINP = procollagen III, hsTnT = high-sensitivity troponin-T, NT-pro BNP = N-Terminal Propeptide, IL-6 = interleukin-6, GDF-15 = growth-differentiation factor-15, hsCRP = high-sensitivity C-reactive protein, HDL = high-density lipoprotein, LDL = low-density lipoprotein, RDW = red cell distribution width, TSH = thyroid stimulating hormone, ft4 = free thyroxin, T4 = thyroxin, T3 = triiodothyronine, eGFR = estimated glomerular filtration rate
